# Supplementary material for: GSK3β-SCFFBXW7α mediated phosphorylation and ubiquitination of IRF1 are required for its transcription-dependent turnover
Source: PubMed Central journal article supplement (PMC6511875; doi:10.1093/nar/gkz163), 2019-03-11
Supplement: gkz163_supplemental_file.pdf [file gkz163_supplemental_file.pdf]

## Supplemental Figure Legends

### Supplementary Figure 1. IRF1 is phosphorylated by GSK3 $\beta$

- A. Alignment of the IRF1 GSK3 consensus site with a subset of other known GSK3 substrates, all sequences are human and the location indicated in parenthesis. Grey highlights indicate phosphorylated residues
- B. Schematic representation of IRF1 functional domains, indicating secondary structure within the DNA binding domain. The TAD (Transcriptional Activation Domain) and Enhancer domains are predicted to be unstructured. The location of the TPALSP motif within the transactivation domain is indicated. The conserved Thr180/181 and Ser184/185 (mouse/ human) GSK3 $\beta$  phosphorylation sites are highlighted in red.
- C. Immunoprecipitation experiments revealing phosphorylation of IRF1 T181 by GSK3 $\beta$ . HEK293 were transfected with expression vectors for YFP-IRF1 WT, YFP-IRF1 T181A, YFP-IRF1 S185A or YFP-IRF1 T181A/S185A together with GSK3 $\beta$ -HA vector or empty vector. Whole cell extracts were immunoprecipitated with anti-pT/S antibody and probed with anti-GFP antibody to detect YFP-IRF1 proteins, indicating T181 phosphorylation levels. The middle panel shows detection of YFP-IRF1 proteins and  $\beta$ -actin loading control (at 10% input for IP). The bottom panel shows GSK3 $\beta$
- D. Quantification of increased pT/S cross-reaction with FLAG-IRF1 upon GSK3 $\beta$  over-expression. Data is from 8 independent experiments performed as for figure 1E. The ratio of the pT/S signal versus the FLAG-IRF1 IP (to control for IP efficiency) is shown. Statistical significance determined by Students t-test.
- E. Co-immunoprecipitation between IRF1 and GSK3 $\beta$  detected using rabbit IgG or IRF1 (C20 human specific) antibodies from H3396 cells treated with IFN $\gamma$  (500U/mL) for 5 hours (plus 3 hour treatment of MG132 or DMSO) prior to lysis.

### Supplementary Figure 2. GSK3 $\beta$ is required for IRF1 transcriptional activity

- A. Indirect immunofluorescence of FLAG-IRF1 and mutants in Cos7, scale bar = 10 $\mu$ m
- B. Reporter assay in MRC5 using the TRAIL-Luc reporter. Statistical differences are determined between WT and mutant IRF1.
- C. H3396 stable cells lines (vector, WT or T181A IRF1) treated with Dox for either 24 or 36 hours to induce expression of IRF1,  $\beta$ -actin is shown as loading control.
- D. Independent H3396 clones for each of empty vector, WT IRF1 and T181A treated as for figure 4A, the expression of IRF1 is shown below as for figure S3C.
- E. Chromatin immunoprecipitation of RNA-Pol II in H3396 cells treated with IFN $\gamma$  (1000U/mL for 3 hr) followed by QPCR across promoter regions of indicated genes identified as containing IRF1 binding sites by ChIP-chip (1).
- F. As for E but using MRC5 cells.

### Supplementary Figure 3. Stability of IRF1 T181A is not affected by GSK3 $\beta$ over-expression and GSK3 $\beta$ inhibition stabilises IRF1

- A. Data from figure 6A re-graphed as a bar chart with significance determined by Student t-test comparing % remaining IRF1 at each post CHX time points between WT and mutant IRF1.

- B. Half-lives of IRF1 protein expressed in MRC5 or HEK293 cells determined by CHX assays related to Fig 6A and 6B
- C. Half-lives in MRC5 and HEK293 related to Fig 6C and 6D
- D. CHX chase in MRC5 cells related to figure 6D but with the addition of the T181A mutant
- E. CHX chase in MRC5 cells (expressing WT FLAG-IRF1) pre-treated with the GSK3 inhibitor X / BIO (1  $\mu$ M) for 1 hour prior to CHX addition and chase as before.

#### **Supplementary Figure 4. Fbxw7 $\alpha$ interacts with IRF1**

- A. HEK293 transfected with GST or GST-Fbxw7 ( $\alpha$ ,  $\beta$ ,  $\gamma$ ) expression plasmids and FLAG-IRF1 for 48 hours. 6 hours prior to lysis cells were treated with MG132 (10  $\mu$ M). Lysates were incubated with Glutathione-Sepharose beads for 3 hours. Captured proteins were revealed by immunoblot with anti-GST and anti-FLAG antibodies. 10% inputs demonstrate expression of transfected proteins.
- B. Indirect immunofluorescence of GSK3 $\beta$  and FBXW7 in Cos7. Scale bar = 10 $\mu$ m.

#### **Supplementary Figure 5. Fbxw7 $\alpha$ regulates IRF1 ubiquitination, half-life and transcriptional activity**

- A. HEK293 CHX chase of cells expressing FLAG-IRF1, HA-Fbxw7 $\alpha$  FL or HA-Fbxw7 $\alpha$   $\Delta$ WD40.
- B. Lysates related to S5A, note the  $\Delta$ WD40 mutant migrates below the nonspecific band detected by the HA antibody.
- C. Western blot panel related to figure 10A
- D. Ubiquitination of IRF1 K $\rightarrow$ R mutants in HEK293 co-transfected with Fbxw7. Lysates were enriched for ubiquitinated proteins by Ni<sup>2+</sup> pulldown and probed with FLAG antibody. Inputs show expression of transfected proteins.
- E. Quantification of ubiquitination status of IRF1 K $\rightarrow$ R mutants using indicated ubiquitin variants. MRC5 transfected with indicated IRF1 and Ub mutants were assayed as before. Data is for three independent repeats. .
- F. Luciferase reporter assays in MRC5 cells expressing indicated IRF1 construct and the 4XISRE-Luc reporter construct.

#### **Supplementary Figure 6. Thr<sup>181</sup> and Fbxw7 are required for IRF1 anti-proliferative activity in cancer cells.**

- A. Bar graph of data presented in 11C. Data is shown as % change in cell number where empty vector is expressed as 100%. Error bars = SEM.

## Supplementary Figures

### Supplementary Figure 1 IRF1 is phosphorylated by GSK3 $\beta$

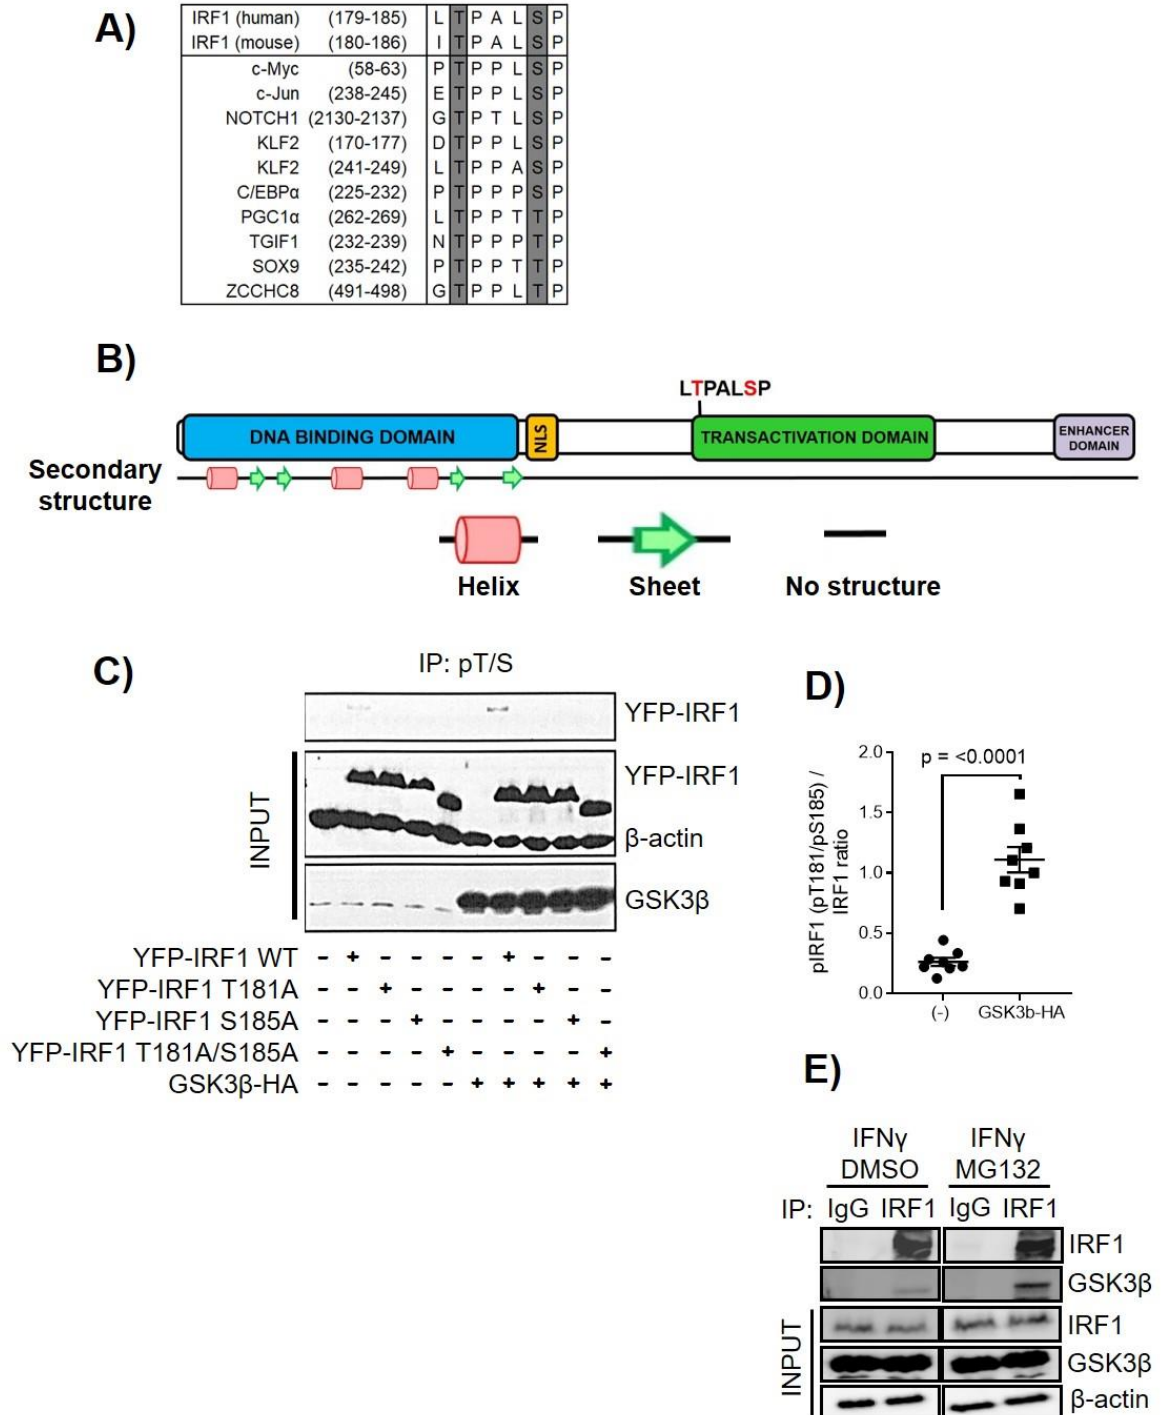

Supplementary Figure 2. GSK3 $\beta$  is required for IRF1 transcriptional activity

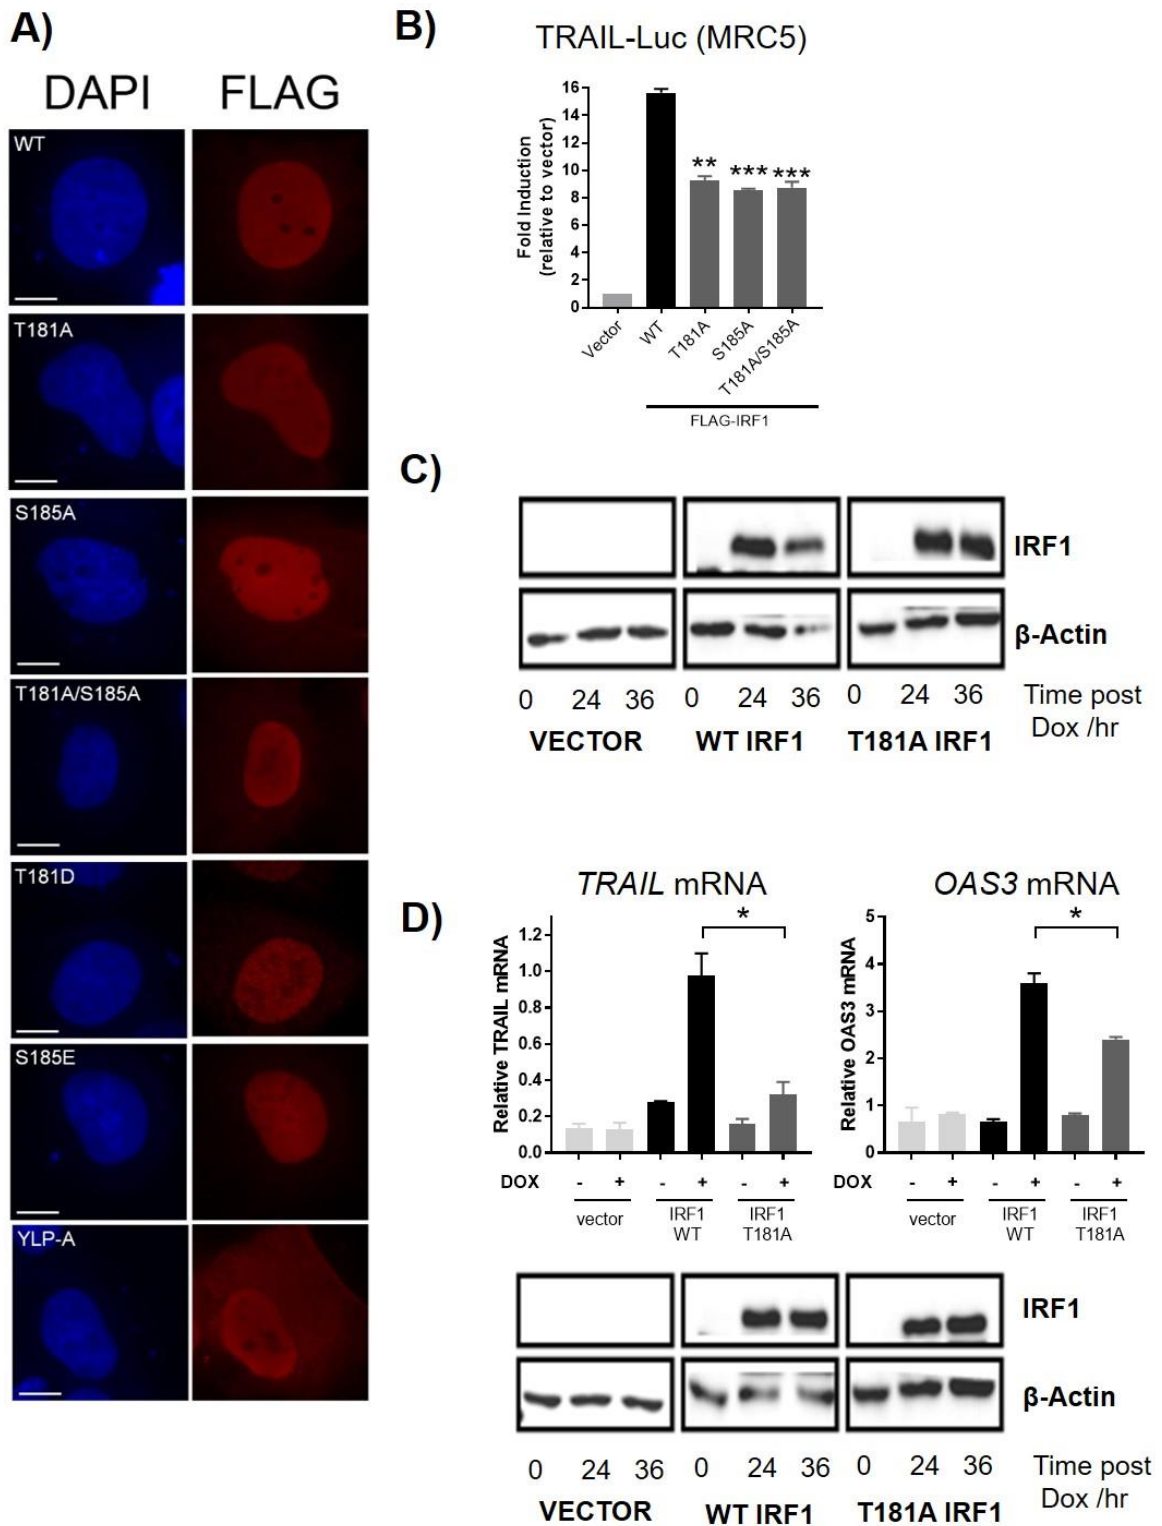

Supplementary Figure 2. GSK3 $\beta$  is required for IRF1 transcriptional activity

E)

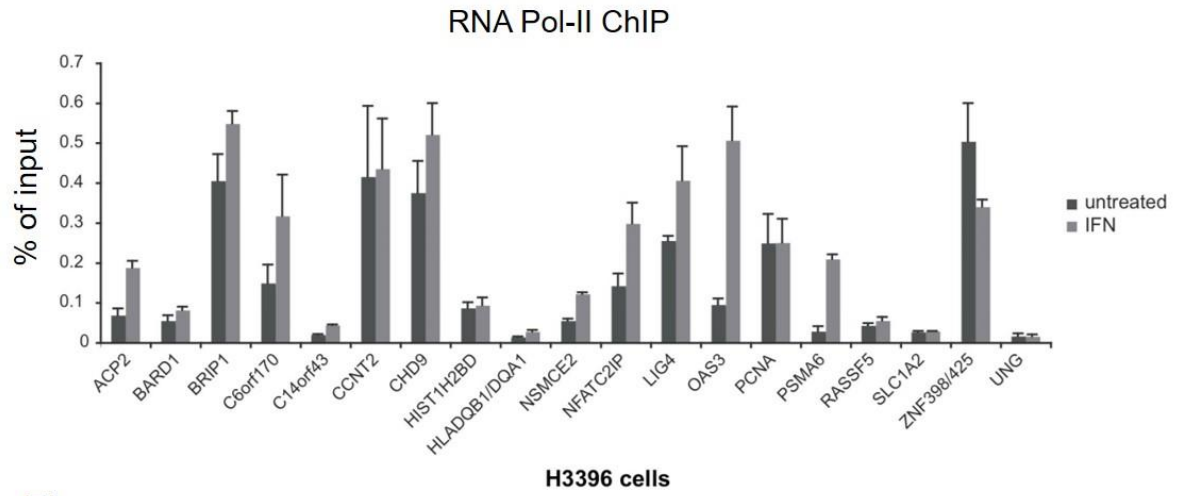

F)

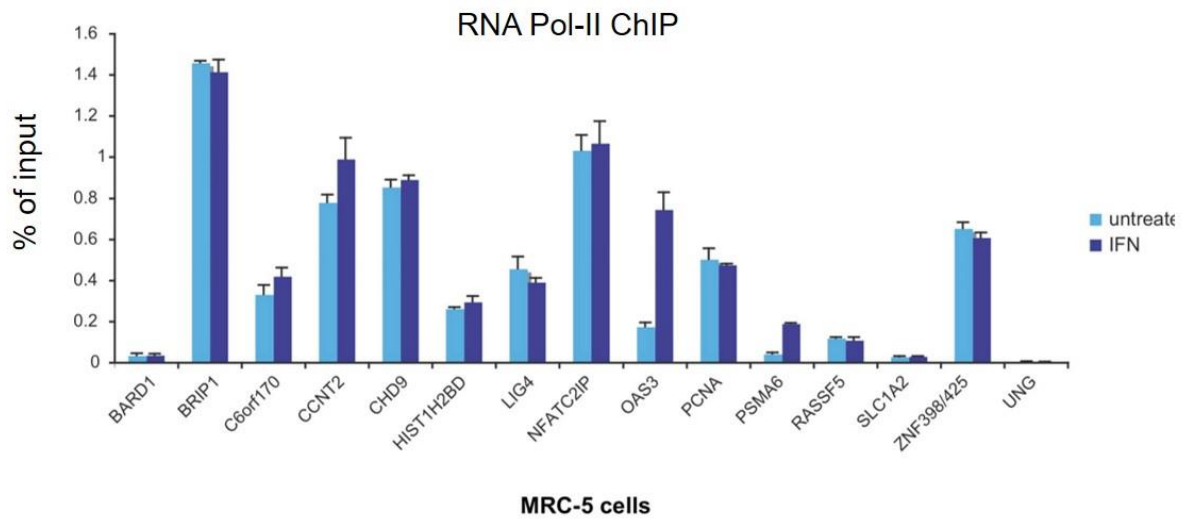

**Supplementary Figure 3. Stability of IRF1 T181A is not affected by GSK3 $\beta$  over-expression and GSK3 $\beta$  inhibition stabilises IRF1**

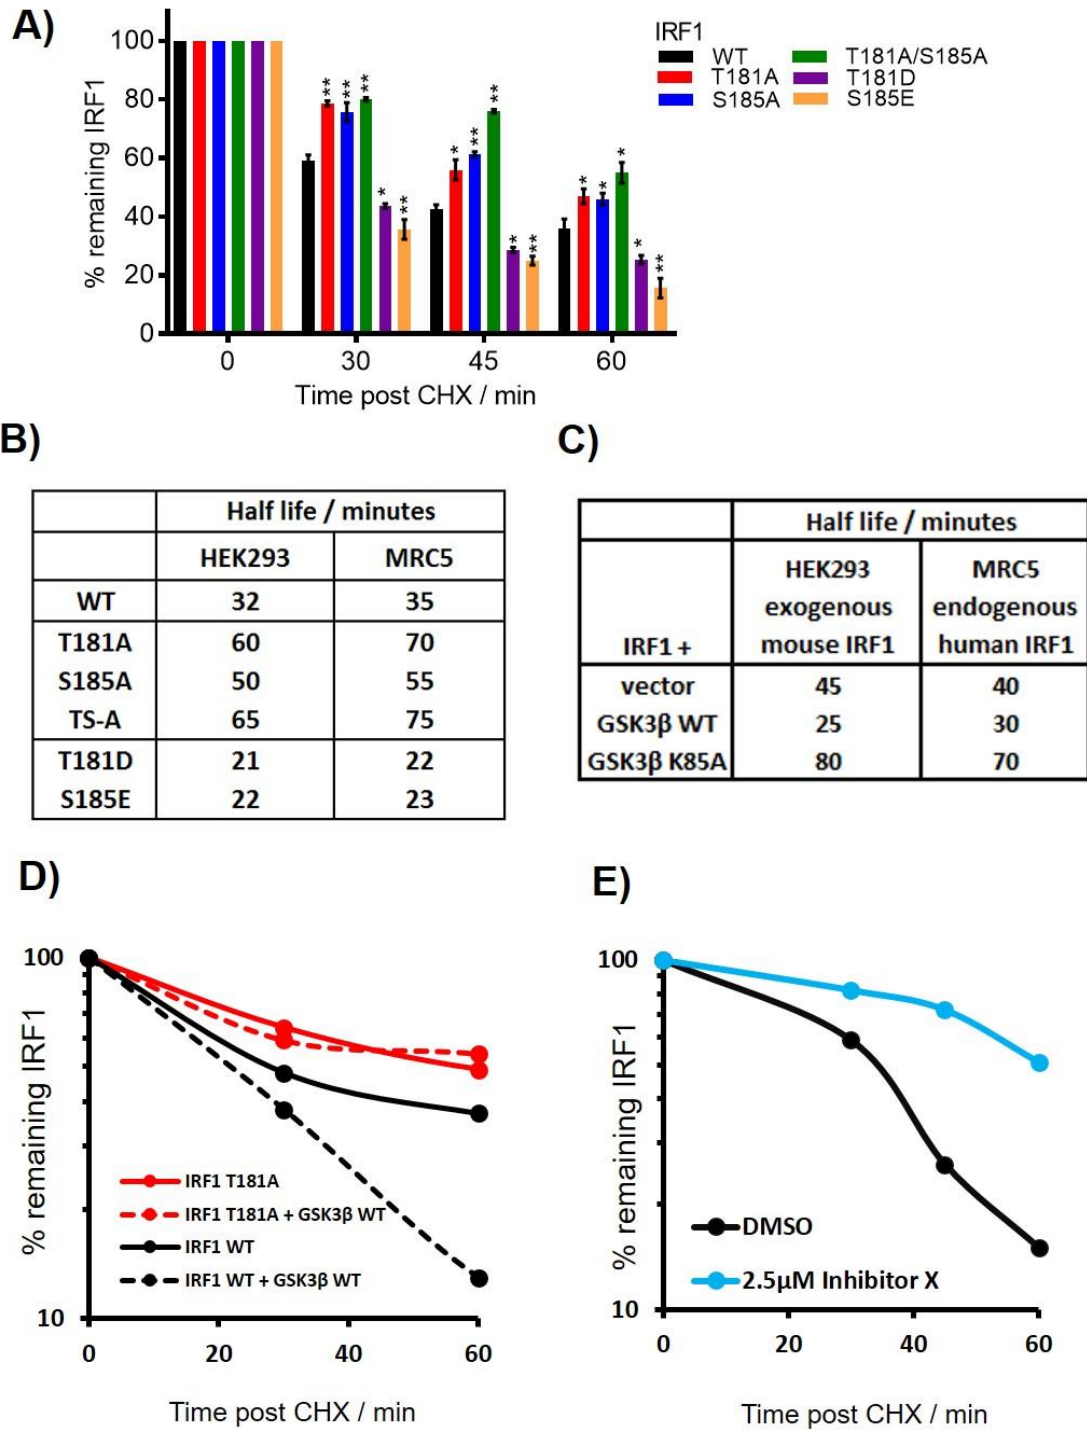

Supplementary Figure 4. Fbxw7 $\alpha$  interacts with IRF1

A)

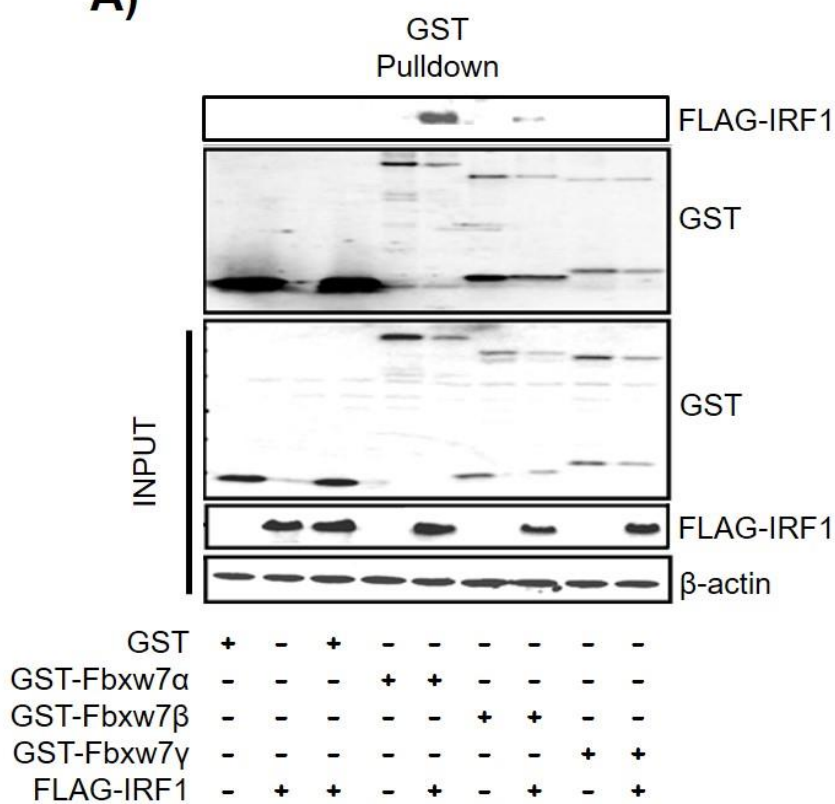

B)

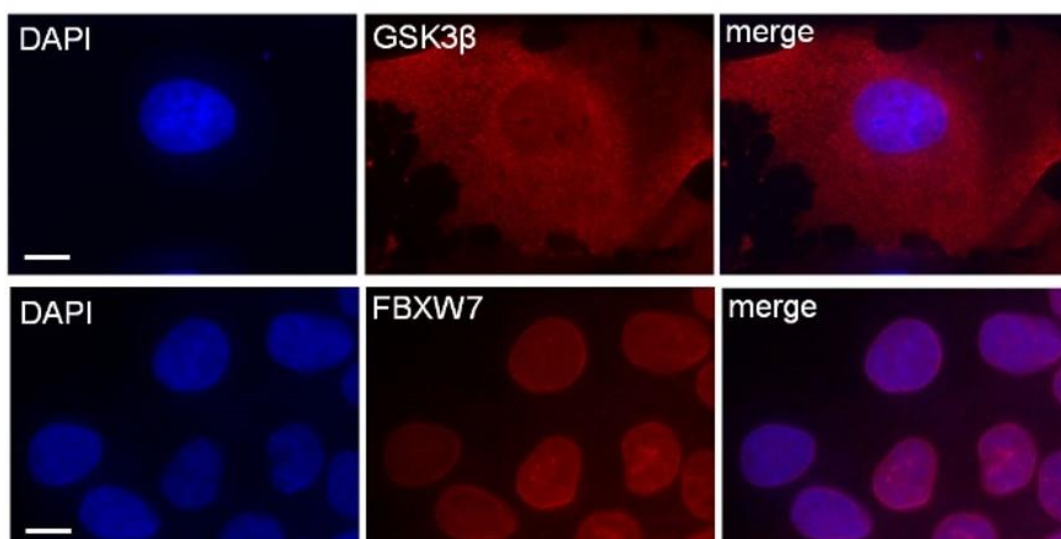

**Supplementary Figure 5. Fbxw7 $\alpha$  regulates IRF1 ubiquitination, half-life and transcriptional activity**

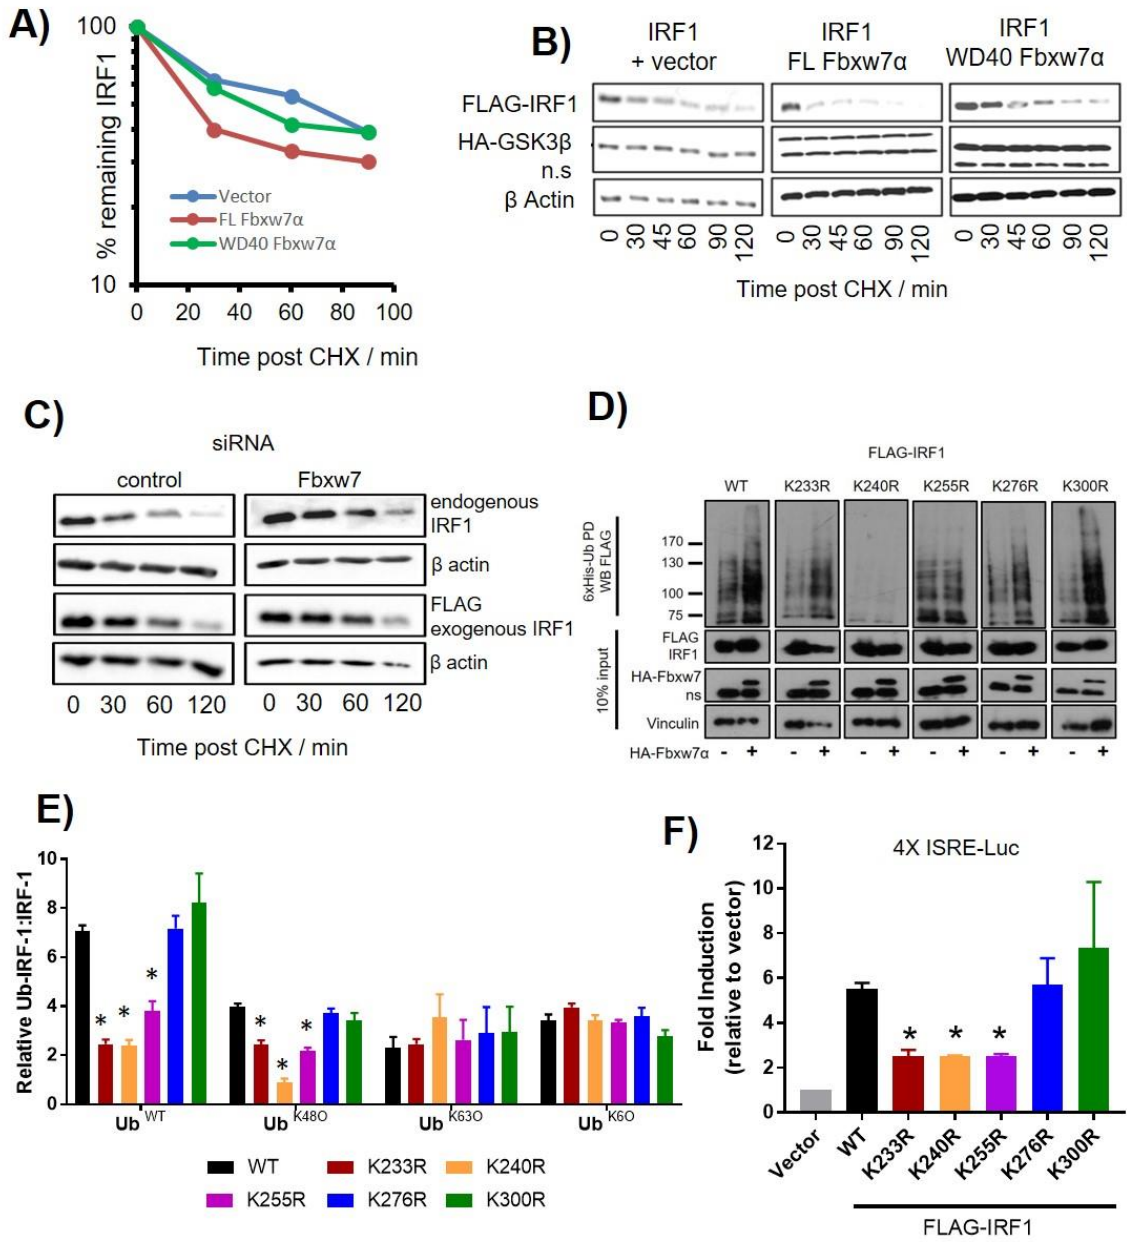



Supplementary Figure 6 Thr<sup>181</sup> and Fbxw7 are required for IRF1 anti-proliferative activity in cancer cells.

A)

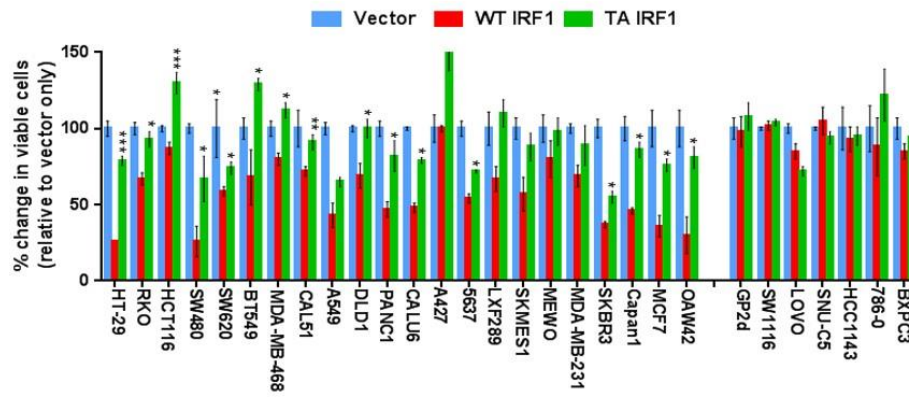

**Supplementary Table 1. Cell lines**

| <b>Cell Line</b> | <b>Tissue</b>   | <b>Growth medium</b> | <b>Fbxw7 status*</b>              |
|------------------|-----------------|----------------------|-----------------------------------|
| 5637             | Urinary Bladder | RPMI                 | WT                                |
| A427             | Lung            | EMEM                 | WT                                |
| A549             | Lung            | DMEM                 | WT                                |
| BT549            | Breast          | DMEM                 | WT                                |
| CAL51            | Breast          | DMEM                 | WT                                |
| CAPAN1           | Pancreas        | DMEM                 | WT                                |
| CALU6            | Lung            | EMEM                 | WT                                |
| DLD1             | Colon           | DMEM                 | WT                                |
| HCT116           | Colon           | DMEM                 | WT                                |
| HT29             | Colon           | DMEM                 | WT                                |
| LXF289           | Lung            | RPMI                 | WT                                |
| MCF7             | Breast          | DMEM                 | WT                                |
| MDA-MB-231       | Breast          | DMEM                 | WT                                |
| MDA-MB-468       | Breast          | DMEM                 | WT                                |
| MeWo             | Melanoma        | EMEM                 | WT                                |
| OAW42            | Ovarian         | DMEM                 | WT                                |
| PANC1            | Pancreas        | DMEM                 | WT                                |
| RKO              | Colon           | DMEM                 | WT                                |
| SKBR3            | Breast          | RPMI                 | WT                                |
| SKMES1           | Lung            | EMEM                 | WT                                |
| SW480            | Colon           | DMEM                 | WT                                |
| SW620            | Colon           | DMEM                 | WT                                |
| 786-O            | Kidney          | RPMI                 | Homozygous deletion               |
| BxPC3            | Pancreas        | RPMI                 | Homozygous deletion               |
| GP2d             | Colon           | DMEM                 | H580R (WD40 repeats)              |
| HCC1143          | Breast          | RPMI                 | Deletion (Mao <i>et al.</i> 2010) |
| LoVo             | Colon           | DMEM                 | R505C (WD40 repeats)              |
| SNU-C5           | Colon           | DMEM                 | S668fs39                          |
| SW1116           | Colon           | DMEM                 | H460Y (WD40 repeats)              |
| H3396            | Breast          | RPMI                 | WT                                |
| MRC5             | Lung fibroblast | Alpha MEM            | WT                                |

\* Fbxw7 status was determined from the cancer cell line encyclopaedia

**Supplementary Table 2. Antibodies**

| <b>Antibody / Concentration</b>                                       | <b>Supplier</b> | <b>Use</b> |
|-----------------------------------------------------------------------|-----------------|------------|
| Murine IRF1 (M20) (1:1000)                                            | Santa Cruz      | WB, IP     |
| Human IRF1 (C20) (1:1000)                                             | Santa Cruz      | WB, IP     |
| Phospho-c-Myc (Thr <sup>58</sup> /Ser <sup>62</sup> ) (pT/S) (1:1000) | Santa Cruz      | WB, IP     |
| GSK3 $\beta$ (27C10) (1:2000)                                         | CST             | WB, IP     |
| GSK3 $\beta$ ab93926 (1:500)                                          | Abcam           | IF         |
| Phospho-Threonine-Proline (9391) (1:1000)                             | CST             | IP         |
| GFP (1:2000)                                                          | Roche           | WB         |
| GST (1:2000)                                                          | SIGMA           | WB         |
| FLAG M2 (1:2000)                                                      | SIGMA           | WB, IP     |
| HA 12CA5 (1:2000)                                                     | SIGMA           | WB, IP     |
| $\beta$ -Actin (A5441) (1:2000)                                       | SIGMA           | WB         |
| Tubulin (T8203) (1:2000)                                              | SIGMA           | WB         |
| RNAP II (N20)                                                         | Santa Cruz      | ChIP       |
| pSerine 2 RNAP II (ab5095)                                            | Abcam           | ChIP       |
| Vinculin (ab129002) (1:2000)                                          | Abcam           | WB         |
| Ki57 (ab15580)                                                        | Abcam           | IF         |
| Histone H3 (ab10779) (1:2000)                                         | Abcam           | WB         |
| GAPDH (ab8245) (1:2000)                                               | Abcam           | WB         |
| Fbxw7 (ab109617) (1:1000)                                             | Abcam           | IF         |
| Lamin B1 (ab16048) (1:2000)                                           | Abcam           | WB         |

**Supplementary table 3. Primers**

| Primer                                | Sequence                                                                                            |
|---------------------------------------|-----------------------------------------------------------------------------------------------------|
| IRF1 T181A                            | F: ATGGAAAGGGACATAGCTCCAGCACTGTCACCG<br>R: CGGTGACAGTGCTGGAGCTATGTCCCTTTCCAT                        |
| IRF1 S185A                            | F: CATAACTCCAGCACTGACACCGTGTGTCGTCAG<br>R: CTGACGACACACGGTGTCAGTGCTGGAGTTATG                        |
| IRF1 T181A/S185A                      | F: GGAAAGGGACATAGCTCCAGCACTGGC<br>R: GCCAGTGCTGGAGCTATGTCCCTTTCC                                    |
| IRF1 T181D                            | F: GGACTTGGATAGGAAAGGGACATAGATCCAGCACTGTCA<br>R: TGACAGTGCTGGATCTATGTCCCTTTCCATATCCAAGTCC           |
| IRF1 S185E                            | F: AGGGACATAACTCCAGCACTGGAGCCGTGTGTCGTCAGCAGCAGT<br>R: TCCCTGTATTGAGGTCGTGACCTCGGCACACAGCAGTCGTCGTC |
| IRF1 YLP-A                            | F: GCGGGTGGCCCGGATGGCGGCACCCCTCACCAGG<br>R: CCTGGTGAGGGGTGCCGCCATCCGGGCCACCCGC                      |
| IRF1 K233R                            | F: GGATGAGGAAGGGAGGATAGCCGAAGACC<br>R: GGTCTTCGGCTATCCTCCCTTCTCATCC                                 |
| IRF1 K240R                            | F: GATAGCCGAAGACCTTATGAAGGCTCTTTGAACAGTCTGAG<br>R: CTCAGACTGTTCAAAGAGCCTCATAAGGTCTTCGGCTATC         |
| IRF1 K255R                            | F: GACACACATCGATGGCAGGGGATACTTGCTCAATG<br>R: CATTGAGCAAGTATCCCCTGCCATCGATGTGTGTC                    |
| IRF1 K276R                            | F: GGAGACTTCAGCTGCAGAGAGGAACCAGAGATTG<br>R: CAATCTCTGGTTCCTCTCTGCAGCTGAAGTCTCC                      |
| IRF1 K300R                            | F: CATGTCTTCACGGAGATGAGGAATATGGACTCCATCATG<br>R: CATGATGGAGTCCATATTCCTCATCTCCGTGAAGACATG            |
| IRF1 (pEYFP)                          | F: ATAATAAGATCTATGCCAATCACTCGAATG<br>R: ATAATATCTAGACTATGGACAAGGAAT                                 |
| IRF1 (FLAG)                           | F: ATAATAAAGCTTATGCCAATCACTCGAATG<br>R: ATAATATCTAGACTATGGACAAGGAAT                                 |
| HA-Fbxw7 $\alpha$ FL                  | F: ATAATAGAATTCATGAATCAGGAACTGCTCTCTGTG<br>R: TATTATTCTAGATCACTTCATGTCCACATCAAAGTC                  |
| HA-Fbxw7 $\alpha$ FL<br>$\Delta$ WD40 | F: ATAATAGAACCTAAGGTGCTGAAAGGACATGAT<br>R: TATTATTCTAGATCAAGATTTGAGTTCTCCTCGCCT                     |
| RT-QPCR primers                       | Clarke <i>et al.</i> 2004                                                                           |
| ChIP primers                          | Clarke <i>et al.</i> 2004                                                                           |

1. Frontini, M., Vijayakumar, M., Garvin, A. and Clarke, N. (2009) A ChIPchip approach reveals a novel role for transcription factor IRF1 in the DNA damage response. *Nucleic Acids Research*, **37**, 1073-1085.
